# Supplementary material for: Distribution and species diversity of the floating green macroalgae and micro-propagules in the Subei Shoal, southwestern Yellow Sea
Source: PeerJ. 2020 Dec 17;8:e10538. doi: 10.7717/peerj.10538 (PMC7749999; doi:10.7717/peerj.10538)
Supplement: Supplemental Information 1 [file peerj-08-10538-s001.xls]

## Sheet: sheet 1
station	long	lat	Micro-propagule	Micro-propagule (SCAR+)	Floating biomass	Floating biomass (SCAR+)	T	salinity	Chl a	DO	DIN	PO4-P	Distance
SA1	121.67	32.3328	12.6667	3	0	0	17.3	30.21	2.80302	8.53	16.6167	0.04142	7.6
SA2	121.92	32.3328	6	0	0	0	16.2	31.01	1.80048	8.74	13.1774	0.10036	28.5
SA3	122.17	32.3328	31.6667	0	0	0	14.4	30.68	1.51404	8.56	14.6046	0.19688	49.4
SB1	121.25	32.6658	432	108	0	0	18	31.19	1.87209	8.94	18.0561	0.04208	4.8
SB2	121.454	32.6658	164	25	0.24	0.1	17.2	31.25	2.27106	9.46	19.5825	0.07314	20
SB3	121.75	32.6658	61.3333	31	0.54	0.2	16.5	31.4	1.87209	8.7	9.73302	0.20624	35
SB4	122	32.6658	153	57	0.8	0.8	15.7	31.38	1.98462	8.46	7.91667	0.12244	51
SC1	121.25	33	354	0	4.72	4.7	18.5	28.69	1.20714	8.24	35.101	0.0767	0
SC2	121.5	33	350.333	105	34.42	17.2	17.3	31.03	1.57542	9.2	13.8413	0.18488	13
SC3	121.75	33	247.333	124	13.5	9	16.81	31.56	2.2506	8.63	13.8446	0.03644	34
SC4	122	33	45.6667	0	4.05	4.1	15.7	32.18	3.70326	8.94	9.75816	0.03386	56.8
SD2	121.083	33.3328	275	42	0.74	0.7	18.6	29.37	1.45266	8.3	30.5393	0.34814	0
SD3	121.333	33.3328	326.667	163	1.5	1.5	17.7	30.37	1.56519	8.57	18.2908	0.21194	11.9
SD4	121.583	33.3328	92.3333	92	8.1	8.1	17.4	31.31	1.15599	9.36	10.8711	0.1917	32.3
SD5	121.833	33.3328	9	9	0.8	0.8	16.5	31.09	0.98208	9.22	5.52573	0.01826	55.1
SE1	120.666	33.6658	85	0	0	0	19.1	28.46	0.82863	8.65	35.5903	0.38062	47.4
SE2	120.917	33.6658	61	16	0.13	0.1	18.5	29.76	1.30944	8.72	24.0565	0.10006	34.6
SE3	121.167	33.6658	82	18	2.36	2.1	17.6	30.5	1.51916	8.42	18.2812	0.03254	35.1
SE4	121.418	33.6658	215	60	33.75	27	16.9	30.95	1.42197	10.25	12.4182	0.02166	48.5
SE5	121.666	33.6658	37	12	35.1	35.1	16.4	31.51	1.20202	10	7.43417	0.03542	67.2
SE6	121.914	33.6658	18	18	2.02	2	15.8	32.13	1.36059	8.56	7.33734	0.01906	88.1
SF1	120.5	34	12	3	0	0	19.2	29.03	0.80817	8.9	42.3662	0.28982	85.7
SF2	120.75	34	85	0	0	0	18.5	29.56	1.87209	8.63	29.0041	0.43886	74.7
SF3	121	34	72	16	51.67	37.6	18.2	29.97	1.28898	9.6	18.8022	0.29128	70
SF4	121.25	34	145	62	62.1	62.1	18	30.73	1.01277	9.2	12.5742	0.22312	72.7
SF5	121.5	34	40	20	42.52	36	17.4	31.21	0.67518	8.8	13.1007	0.04272	82.2
SF6	121.75	34	12	6	17.55	17.6	16.2	31.88	1.14064	8.7	5.98997	0.15104	101.2
