# Supplementary material for: Distribution and species diversity of the floating green macroalgae and micro-propagules in the Subei Shoal, southwestern Yellow Sea
Source: PeerJ. 2020 Dec 17;8:e10538. doi: 10.7717/peerj.10538 (PMC7749999; doi:10.7717/peerj.10538)
Supplement: Supplemental Information 2 [file peerj-08-10538-s002.xlsx]

## Sheet: Sheet1
micro-propagules								floating biomass
	U. prolifera (+)	U. prolifera (－)	U. linza	Ulva sp.	total				U. prolifera (+)	U. prolifera (－)	U. linza	Ulva sp.	Blidingia sp.	total
SA1	2.92308	0	5.84615	3.89744	12.6667			SB2	2	3	0	0	0	5
SA2	0	0	4	2	6			SB3	1.66667	1.66667	0	2	0	6
SA3	0	0	31.6667	0	31.6667			SB4	5	0	0	0	0	5
SB1	108	72	180	72	432			SC1	9	0	0	0	1	10
SB2	25.2308	12.6154	88.3077	37.8462	164			SC2	10	10	0	0	0	20
SB3	30.6667	0	30.6667	0	61.3333			SC3	10	0	3	2	0	15
SB4	57.375	0	95.625	0	153			SC4	10	0	0	0	0	10
SC1	0	0	221.25	132.75	354			SD2	3	0	1	0	0	4
SC2	105.1	105.1	140.133	0	350.333			SD3	10	0	0	0	0	10
SC3	123.667	0	82.4444	41.2222	247.333			SD4	10	0	0	0	0	10
SC4	0	0	45.6667	0	45.6667			SD5	5	0	0	0	0	5
SD2	42.3077	21.1538	105.769	105.769	275			SE2	5	0	0	0	0	5
SD3	163.333	0	163.333	0	326.667			SE3	9	1	0	0	0	10
SD4	92.3333	0	0	0	92.3333			SE4	16	0	4	0	0	20
SD5	9	0	0	0	9			SE5	20	0	0	0	0	20
SE1	0	0	47.2222	37.7778	85			SE6	10	0	0	0	0	10
SE2	16.2667	12.2	32.5333	0	61			SF3	14.5455	0	5	0	0	20
SE3	18.2222	9.11111	54.6667	0	82			SF4	20	0	0	0	0	20
SE4	59.7222	0	95.5556	59.7222	215			SF5	16.9231	3.07692	0	0	0	20
SE5	12.3333	0	0	24.6667	37			SF6	15	0	0	0	0	15
SE6	18	0	0	0	18
SF1	2.57143	0	8.57143	0.857143	12
SF2	0	0	85	0	85
SF3	16	0	48	8	72
SF4	62.1429	0	82.8571	0	145
SF5	20	0	0	20	40
SF6	6	0	6	0	12
